# Supplementary material
Source: ML conference proceedings conference paper supplement (https://openreview.net/forum?id=5VtI484yVy)
Supplement: supplementary_material [file attachment]

# A Benchmark Suite for Systematically Evaluating Reasoning Shortcuts: Supplementary Material

**Samuele Bortolotti**  
U. Trento

**Emanuele Marconato**  
U. Trento

**Tommaso Carraro**  
Fondazione Bruno Kessler

**Paolo Morettin**  
U. Trento

**Emile van Krieken**  
U. Edinburgh

**Antonio Vergari**  
U. Edinburgh

**Stefano Teso**  
U. Trento

**Andrea Passerini**  
U. Trento

## 1 Code, Data Sets and Generators

In the following, we discuss: 1) code and data licensing [Section 1.1](#), 2) how the data was collected and organised [Section 1.4](#), 3) what kind of information it contains [Section 1.5](#), 4) how it should be used ethically and responsibly [Section 1.2](#), 5) how it will be made available and maintained [Section 1.3](#). All data, generators, metadata, and experimental code for reproducing the results are available at: <https://unitn-sml.github.io/rsbench>. Detailed statistics for each data set using the default configuration are reported in [Table 1](#).

Table 1: **Detailed statistics about the *default* data sets in `rsbench`.** For generators, the number of concepts  $k$  is configurable; in CLE4EVR,  $n$  and  $m$  are the minimum and maximum number of objects.

| TASK          | INFO x                   | INFO c                       | INFO y                   | TRAIN  | VAL    | TEST   | OOD    |
|---------------|--------------------------|------------------------------|--------------------------|--------|--------|--------|--------|
| MNMath        | $28k \times 28$          | $k$ digits, 10 values each   | cat multilabel           | custom | custom | custom | custom |
| MNAdd-Half    | $56 \times 28$           | 2 digits, 10 values each     | cat (19 values)          | 2,940  | 840    | 420    | 1,080  |
| MNAdd-EvenOdd | $56 \times 28$           | 2 digits, 10 values each     | cat (19 values)          | 6,720  | 1,920  | 960    | 5,040  |
| MNLogic       | $28k \times 28$          | $k$ digits, 2 values each    | binary                   | custom | custom | custom | custom |
| Kand-Logic    | $3 \times 192 \times 64$ | 3 objects per image          | binary                   | 4,000  | 1,000  | 1,000  | –      |
|               |                          | 3 shapes                     |                          |        |        |        |        |
|               |                          | 3 colors                     |                          |        |        |        |        |
| CLE4EVR       | $320 \times 240$         | $n$ to $m$ objects per image | binary                   | custom | custom | custom | custom |
|               |                          | 10 shapes                    |                          |        |        |        |        |
|               |                          | 10 colors                    |                          |        |        |        |        |
|               |                          | 2 materials                  |                          |        |        |        |        |
|               |                          | 3 sizes                      |                          |        |        |        |        |
| BDD-OIA       | $1280 \times 720$        | 21 binary concepts           | bin multilabel, 4 labels | 16,082 | 2,270  | 4,572  | –      |
| SDD-OIA       | $469 \times 387$         | 21 binary concepts           | bin multilabel, 4 labels | 6,820  | 1,464  | 1,464  | 1,000  |

### 1.1 Licensing

**Code.** Most of our code is available under the [BSD 3-Clause](#) license. The CLE4EVR and SDD-OIA generators are derived from the CLEVR code base, which is available under the BSD license. The Kand-Logic generator is derived from the Kandinsky-patterns code base, which is available under the [GPL-3.0](#) license, and so is our generator.

**Data.** MNMath, MNAdd-Half, MNAdd-EvenOdd and MNLogic are derived from [MNIST](#) [1], which is distributed under CC-BY-SA 3.0, and so are our data sets and generated data. BDD-OIA is derived

15 from BDD-100k [2], which is distributed under a BSD 3-Clause license, and so is our data set. Data  
16 sets and generated data for Kand-Logic and SDD-OIA are available under a CC-BY-SA 4.0 license.

## 17 1.2 Ethical Statement

18 rsbench is a collection of datasets aimed at exploring challenges related to concept quality, par-  
19 ticularly focusing on identifying reasoning shortcuts. It also includes a formal verification tool to  
20 assess how often these shortcuts occur in specific configurations. Essentially, rsbench aims to help  
21 investigating concept quality in neural, neuro-symbolic and foundation models. Although this is  
22 not its intended purpose, such a benchmark may inadvertently used to improve models designed for  
23 harmful applications. However, to our knowledge, our work does not directly threaten individuals or  
24 society. Additionally, since most datasets are synthetically generated, they do not cause harm during  
25 creation. BDD-OIA, just like BDD-100k, could in principle be used to train models that aim to cause  
26 harm. We expressly disapprove of this usage.

## 27 1.3 Hosting and Maintenance Plan

28 The data is openly available on Zenodo at [https://zenodo.org/doi/10.5281/zenodo.](https://zenodo.org/doi/10.5281/zenodo.11612555)  
29 [11612555](https://zenodo.org/doi/10.5281/zenodo.11612555). The data set generators are freely available on Github. The repository is linked in  
30 our website: <https://github.com/unitn-sml/rsbench>.

## 31 1.4 Data Collection

32 rsbench makes uses of two pre-existing data collections, namely MNIST and BDD-OIA. In this  
33 section, we briefly describe this data and how it is collected.

34 MNIST: The MNIST [1] dataset is a well known collection of handwritten digits, consisting of 60,000  
35 training images and 10,000 test images. Each image is a  $28 \times 28$  grayscale image of a numerical  
36 digit ranging from 0 to 9. The dataset was created by Yann LeCun, Corinna Cortes and Christopher  
37 J.C. Burges. MNAdd-EvenOdd and MNAdd-Half build on the MNIST dataset [3, 4]. MNLogic and  
38 MNMath, two datasets that can be generated from rsbench, make use of MNIST images.

39 BDD-OIA: BDD-OIA [5] is a dataset based on BDD-100K [2] dataset. BDD-100K is a large collection  
40 consisting of driving video data, developed by researchers at the University of California, Berkeley.  
41 The dataset is suitable for multitask learning, ranging from object detection to semantic segmentation  
42 and object tracking. It contains 100,000 videos and images, collected under diverse driving conditions,  
43 times of day, and geographic locations. The data is annotated with labels including bounding boxes,  
44 lane marking, and drivable area segmentation. For further information, please refer to the original  
45 paper [2].

## 46 1.5 Data Generators

47 Each rsbench data generator comprises two Python components: the *generator* proper samples  
48 new data, and the associated *parser* reads the configuration from a YAML file. The latter also validates  
49 the configuration, *i.e.*, check for required fields and ensure the logical formulas work as intended.  
50 Users can also configure the generators through the command line. Generated images are stored in  
51 PNG format, and ground-truth annotations as JOBLIB metadata.

52 **Shared configuration options.** All generators support a set of basic command line settings: `config`:  
53 path to the YAML configuration file; `output_dir`: path to the output directory; `n_samples`: number  
54 of samples to be generated; `log_level`: verbosity level; `seed`: RNG seed, for reproducibility;

55 They all comply with the following YAML settings: `symbols`: names of the logic symbols (con-  
56 cepts) that appear in the knowledge; the order is managed internally by rsbench; `logic`: formal  
57 specification of the knowledge as a sympy formula, used for computing the ground truth labels;  
58 `prop_in_distribution`: proportion of examples to put in the in-distribution sets (train, validation,  
59 and test), up to 100%; `combinations_in_distribution`: what combinations of concept values

60 should be included in the in-distribution sets. `val_prop`: proportion of examples to put in the  
61 validation set; `test_prop`: proportion of examples to put in the test set;

62 **Non-Blender generators:** MNMath, MNLogic, and Kand-Logic. The generator first parses the YAML  
63 configuration file, then proceeds to randomly sample the required number of examples. It generates a  
64 series of label and concept assignments that comply with the combinations combinations specified by  
65 the config file, if any. The ground-truth label is computed using the knowledge K. For MNMath, which  
66 is multi-class and multi-label, this involves splitting the configurations between classes or random  
67 sampling. Before the generation of the dataset, rsbench automatically checks whether the sampled  
68 configurations produce labels that are either all false or all true, and returns an error to the user if  
69 such a condition is found.

70 If the `prop_in_distribution` flag is set, the specified ratio is assigned to the in-distribution datasets  
71 (training, validation, and test), while the remaining settings are allocated to the out-of-distribution  
72 datasets. An equal number of examples are then assigned to both positive and negative configurations  
73 chosen for training, testing, and validation. This is achieved by sampling configurations alternately  
74 from positive and negative sides, with replacement. Depending on the dataset, examples are generated,  
75 and information such as labels and concepts are stored as JOBLIB metadata.

76 Finally, rsbench provides the option to specify a compression type (*e.g.*, zip) for storing the dataset,  
77 ensuring efficient storage and easy distribution.

78 **Blender-based generators.** Generating 3D images involves running scripts from within Blender,  
79 which requires a different setup. These scripts read all configuration from the command line  
80 and specified configuration files. Options include the positions of shapes (`shape_dir`) and  
81 materials (`material_dir`), the output directories (`output_image_dir` for the examples and  
82 `output_scene_dir` for metadata), the image resolution (`width, height`), and details bout the rendering  
83 step (like `render_tile_size`, `render_num_samples`, `camera_jitter`, `light_jitter`).  
84 The rendering engine used for CLE4EVR is CYCLES, while SDD-OIA uses the EEVEE rendering engine  
85 to speed up rendering, although this can be easily changed by the user.

86 The generators build on the implementation of [6]. The images are stored as PNGs, while the metadata,  
87 in JSON format, contains information about concepts, ground truth labels, object bounding boxes,  
88 object positions, and relationships between objects (*e.g.*, that one object is behind another). Unlike  
89 the synthetic data generation case, these scripts currently do not offer an option to compress the  
90 dataset, though this is a future contribution under consideration.

## 91 1.6 MNMath Data Generator

92 Additional YAML config for MNMath are the number of digits per image (`num_digits`) and the subset  
93 of candidate digits (`digit_values`). The code expects `num_digits` names for `symbols`: the first  
94 one is assigned to the first digit, the second symbol to the second digit, and so on. With `logic`,  
95 the user can provide the system of equations. With `combinations_in_distribution`, the user  
96 can have fine-grained control over the in-distribution data (*e.g.*, specifying "0234" means that the  
97 in-distribution data contains `0 2 3 4`).

## 98 1.7 MNLogic Data Generator

99 The YAML file allows to specify the number of Boolean variables in the formula, as well as the formula  
100 itself. The knowledge defaults to the  $k$ -bit XOR. rsbench includes a script for generating random  
101  $\ell$ -CNF formulas, which can be readily used with MNLogic by setting `xor_rule` to false and `logic`  
102 to the target formula. If `use_mnist` is set, the input images are of size  $(k \cdot 28) \times 28$  and obtained by  
103 concatenating  $k$  MNIST digits, one per bit. Otherwise, the code defaults to the setup of [3], where the  
104 inputs are encoded as  $k \times 1$  black-and-white images, one pixel per bit.

105 You can filter what types of data appear in-distribution with `combinations_in_distribution`  
106 (*e.g.*, specifying 0101 means the in-distribution data contains `0 1 0 1`).

**Table 2:** Example of MNMath data

| YAML config                                                                  | JOBLIB metadata                                                                                        | PNG data                                                                            |
|------------------------------------------------------------------------------|--------------------------------------------------------------------------------------------------------|-------------------------------------------------------------------------------------|
| <pre> num_digits: 2 symbols:   - a   - b logic:   - 2*a + b   - a + b </pre> | <pre> {   'label': [6, 7],   'meta': {     'concepts': [       [2, 2],       [3, 4]     ]   } } </pre> |  |

**Table 3:** Example of MNLogic data

| YAML config                                                                                                        | JOBLIB metadata                                                                                                | PNG data                                                                             |
|--------------------------------------------------------------------------------------------------------------------|----------------------------------------------------------------------------------------------------------------|--------------------------------------------------------------------------------------|
| <pre> n_digits: 3 xor_rule: False symbols:   - a   - b   - c logic:   Or(And(a, b), Not(c)) use_mnist: True </pre> | <pre> {   'label': True,   'meta': {     'concepts': [       True,       False,       False     ]   } } </pre> |  |

## 1.8 Kand-Logic Data Generator

The YAML file allows specifying: `n_shapes`, the number of primitives per figure; `n_figures`: the number of figures per input image; `colors`, a subset of {red, yellow, blue}; `shapes`: a subset of {square, circle, triangle}. The first two `symbols` are associated to the first primitive in the first image, and refer to its shape and color, respectively; the next two to the second primitive, and so on for all primitives and figures in the input. `logic` applies to each individual figure. The ground-truth label of an image (consisting of multiple figures) is specified by `aggregator_symbols` and `aggregator_logic`. These give names to the variables holding the truth value for each figure, and how these values are aggregated to yield the ground-truth label, respectively.

The user can specify which data combination to generate in-distribution by setting `combinations_in_distribution` (e.g., specifying • "red, square" • "blue, square" • "blue, square" means the in-distribution data contains an image made of a red square and two blue squares).

## 1.9 CLE4EVR Data Generator

The data generation process for CLE4EVR closely resembles that of previous datasets. To generate the datasets, the program samples various configurations, specifically the number of objects, shapes, colors, and sizes. These configurations are then divided into positive and negative sets based on the whether they satisfy the knowledge `logic`. The sets are used to generate images while maintaining a balanced ratio of positive and negative ground-truth samples.

**Table 4:** Example of Kand-Logic data

| YAML config                                                                                                                                                                                                                                                                                                                                                                                                             | JOBLIB metadata                                                                                                                                                                                  | PNG data                                                                            |
|-------------------------------------------------------------------------------------------------------------------------------------------------------------------------------------------------------------------------------------------------------------------------------------------------------------------------------------------------------------------------------------------------------------------------|--------------------------------------------------------------------------------------------------------------------------------------------------------------------------------------------------|-------------------------------------------------------------------------------------|
| <pre> colors:   - red   - yellow   - blue shapes:   - circle   - square   - triangle symbols:   - shape_1   - color_1   ...   - shape_3   - color_3 logic:   (Eq(color_1, color_2) &amp;    Eq(shape_1, shape_2) &amp;    Ne(shape_1, shape_3))     ... )   # two equal one diff aggregator_symbols:   - pattern_1   - pattern_2   - pattern_3 aggregator_logic:   pattern_1 &amp;   pattern_2 &amp;   pattern_3 </pre> | <pre> {   'label': True,   'meta': {     'concepts': [       [6, 2,        5, 1,        6, 2],       [6, 1,        5, 2,        6, 1],       [5, 2,        5, 2,        4, 1]     ]   } } </pre> |  |

rsbench allows users to customize various aspects of data generation, including the number of objects, whether occlusion is permitted, and the dimensions of the image. The occlusion check, which uses Blender rendering, can be slow for many objects due to rejection sampling.

rsbench by default includes two materials (rubber and metal), nine shapes, and eight predefined colors, with options to create custom blend files and specify RGB values. Default object sizes are large, medium, and small, but users can fully customize these settings in a configuration file.

The symbols for each object, are be defined in the following the order: color, shape, material, and size.

### 1.10 SDD-OIA Data Generator

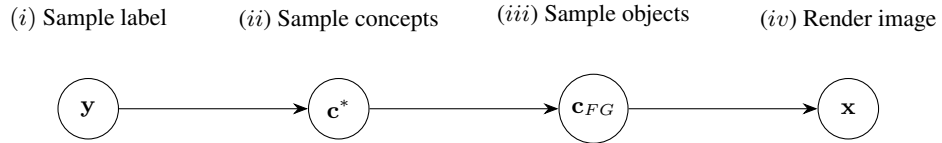

Figure 1: Illustration of the sampling process of SDD-OIA

Regarding SDD-OIA, rsbench allows users to specify parameters such as the number of samples, number of configurations to be generated, and image size.

**Table 5:** Example of CLE4EVR data

| YAML config                                                                                                                                                                                                          | JSON metadata                                                                                                                                           | PNG data                                                                            |
|----------------------------------------------------------------------------------------------------------------------------------------------------------------------------------------------------------------------|---------------------------------------------------------------------------------------------------------------------------------------------------------|-------------------------------------------------------------------------------------|
| <pre> symbols: - color_1 - shape_1 - mat_1 - size_1 - color_2 - shape_2 - mat_2 - size_2 logic:     And(     Eq(color_1, color_2),     Eq(shape_1, shape_2),     Eq(mat_1, mat_2),     Eq(size_1, size_2)   ) </pre> | <pre> {   "label": 0,   "concepts": [     [       0,       1,       0,       0,       0,       0,       0,       0,       0,       0     ]   ] } </pre> | 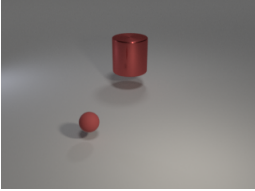 |

For SDD-OIA, the data generation approach differs from other datasets in *rsbench* and follows a Bayesian network [7]. The process involves first (i) sampling the actions  $\mathbf{y}$  from  $p(\mathbf{y})$ , ensuring that the overall dataset is balanced in the labels, *i.e.*,  $p(\mathbf{y})$  is the uniform distribution. (ii) Second, we sample the ground-truth concepts  $\mathbf{c}^*$  from the conditional  $p(\mathbf{c}^* | \mathbf{y})$ . Then, (iii) the concepts  $\mathbf{c}^*$  specify a fine-grained distribution of objects in the scene, denoted as  $\mathbf{c}_{FG}$ , which are sampled through  $p(\mathbf{c}_{FG} | \mathbf{c}^*)$ . Next, the fine-grained objects are used to generate the scene. This step is deterministic and yields the final image  $\mathbf{x}$ . The crossroads scene is essentially a grid where objects' positions are specified by the fine-grained variables  $\mathbf{c}_{FC}$ . This ensures the concepts  $\mathbf{c}^*$  are visible from the car's camera. The scene is then rendered with blender. The process is shown in Fig. 1. All steps in the sampling procedure ensure that all concepts can be retrieved from the image (respecting assumption A1 in Appendix A.3) and that labels can be predicted uniquely from concepts  $\mathbf{c}^*$  (respecting assumption A2 in Appendix A.3).

A key aspect of SDD-OIA is its customizable data generation process, which involves sampling the concepts and constructing the scene. This necessitates a hard-coded compositional framework to correctly position the camera and objects, ensuring visibility from the car's perspective. This approach enables the creation of a high-quality synthetic neuro-symbolic dataset, where objects, sample quantities, and distribution ratios are fully customizable. Like other datasets, SDD-OIA maintains a balanced distribution across all actions. Users can configure model selection, object dimensions, and the probabilities for sampling different objects by adjusting the categorical distribution weights or the hard-coded matrix configuration.

#### 1.10.1 Assets used in SDD-OIA

All assets are made available under permissive licenses that allow reuse for non-commercial purposes.

- Author: stunts. Speed Limit Signs [3D model]. Retrieved from <https://free3d.com/3d-model/speed-limit-signs-172903.html>;
- Author: corrobocz. Concrete street barrier [3D model]. Retrieved from <https://free3d.com/3d-model/concrete-street-barrier-917223.html>;
- Author: paulsendesign. Cartoon low poly trees [3D model]. Retrieved from <https://free3d.com/3d-model/cartoon-low-poly-trees-895299.html>;

**Table 6:** Example of SDD-OIA data

| JSON metadata                                                                                                                                                                                                                                                                                                                                                                                                                                                                                                                                                                                                                          | PNG data                                                                           |
|----------------------------------------------------------------------------------------------------------------------------------------------------------------------------------------------------------------------------------------------------------------------------------------------------------------------------------------------------------------------------------------------------------------------------------------------------------------------------------------------------------------------------------------------------------------------------------------------------------------------------------------|------------------------------------------------------------------------------------|
| <pre> {   "label": [     0,     1,     0,     1   ],   "concepts": {     "red_light": false,     "green_light": true,     "car": false,     "person": false,     "rider": false,     "other_obstacle": false,     "follow": false,     "stop_sign": false,     "left_lane": false,     "left_green_light": true,     "left_follow": false,     "no_left_lane": true,     "left_obstacle": false,     "left_solid_line": false,     "right_lane": true,     "right_green_light": true,     "right_follow": true,     "no_right_lane": false,     "right_obstacle": false,     "right_solid_line": false,     "clear": true   } } </pre> |  |

- 164 • Author: roxas. Low Poly Car [3D model]. Retrieved from [https://free3d.com/3d-model/](https://free3d.com/3d-model/low-poly-car-14842.html)  
165 [low-poly-car-14842.html](https://free3d.com/3d-model/low-poly-car-14842.html);  
166 • Author: RokoTheAwesome. Traffic Light [3D model]. Retrieved from [https://www.](https://www.turbosquid.com/3d-models/traffic-light-547022)  
167 [turbosquid.com/3d-models/traffic-light-547022](https://www.turbosquid.com/3d-models/traffic-light-547022)

168 All the models from free3d are under the **Personal Use License**, meaning the models are available  
169 for free but only for personal or non-commercial use. In contrast, the models from TurboSquid  
170 are under the **Standard 3D Model License**, which permits the use of TurboSquid models in various  
171 commercial projects, such as games and movies. This license allows the creation and distribution  
172 of your end-products without reproduction limitations to any target market or audience indefinitely.  
173 However, the license prohibits making the models themselves directly available to end-users, so  
174 rsbench redirects to the asset URL.

### 175 1.11 BDD-OIA Data

176 Data for BDD-OIA are those previously published in [5]. BDD-OIA images are selected  
177 from BDD-100k only including frames with complicated scenes where multiple actions  
178 {forward, stop, left, right} are possible. This includes situations with multiple objects present.  
179 Following [5], all images are manually annotated for ground-truth actions and 21 associated binary  
180 concepts. The dataset contains 16k frames for training, (with annotated labels and concepts); 2k

181 frames for validation, and 4.5k frames for testing. The table on the right from the previous paper [5]  
 182 reports the overall proportion of labels and concepts.

| Concept classes in BDD-OIA |                   |       |
|----------------------------|-------------------|-------|
| Action Category            | Concepts          | Count |
| move_forward               | green_light       | 7805  |
|                            | follow            | 3489  |
|                            | road_clear        | 4838  |
| stop                       | red_light         | 5381  |
|                            | traffic_sign      | 1539  |
|                            | car               | 233   |
|                            | person            | 163   |
|                            | rider             | 5255  |
|                            | other_obstacle    | 455   |
| turn_left                  | left_lane         | 154   |
|                            | left_green_light  | 885   |
|                            | left_follow       | 365   |
|                            | no_left_lane      | 150   |
|                            | left_obstacle     | 666   |
|                            | left_solid_line   | 316   |
| turn_right                 | right_lane        | 6081  |
|                            | right_green_light | 4022  |
|                            | right_follow      | 2161  |
|                            | no_right_lane     | 4503  |
|                            | right_obstacle    | 4514  |
|                            | right_solid_line  | 3660  |



## 2 Additional Results

Here, we report additional tables for TCAV evaluation complementing the results reported in the main text. All results indicate that TCAV at different layers always attain low  $F_1$ -scores. We also report the  $\text{Cls}(C)$  and  $\text{mAcc}_C$ .

Table 7: Concept metrics for each NN layer using TCAV on MNAdd-EvenOdd

|              | LAYER NUM | $\text{Acc}_C$  | $F_1(C)$        | $\text{Cls}(C)$ |
|--------------|-----------|-----------------|-----------------|-----------------|
| <i>conv1</i> | 1         | $0.11 \pm 0.03$ | $0.10 \pm 0.03$ | $0.00 \pm 0.00$ |
| <i>conv2</i> | 2         | $0.12 \pm 0.03$ | $0.10 \pm 0.04$ | $0.01 \pm 0.02$ |
| <i>fc1</i>   | 3         | $0.12 \pm 0.04$ | $0.09 \pm 0.05$ | $0.24 \pm 0.30$ |
| <i>fc2</i>   | 4         | $0.11 \pm 0.02$ | $0.07 \pm 0.03$ | $0.29 \pm 0.34$ |

Table 8: Concept metrics for each NN layer using TCAV on Kand-Logic

|              | LAYER NUM | $\text{Acc}_C$  | $F_1(C)$        | $\text{Cls}(C)$ |
|--------------|-----------|-----------------|-----------------|-----------------|
| <i>conv1</i> | 1         | $0.35 \pm 0.01$ | $0.34 \pm 0.01$ | $0.00 \pm 0.01$ |
| <i>conv2</i> | 2         | $0.35 \pm 0.01$ | $0.34 \pm 0.01$ | $0.00 \pm 0.01$ |
| <i>conv3</i> | 3         | $0.34 \pm 0.01$ | $0.34 \pm 0.01$ | $0.00 \pm 0.01$ |
| <i>conv4</i> | 4         | $0.35 \pm 0.01$ | $0.34 \pm 0.01$ | $0.00 \pm 0.01$ |
| <i>conv5</i> | 5         | $0.35 \pm 0.01$ | $0.34 \pm 0.01$ | $0.00 \pm 0.01$ |
| <i>fc1</i>   | 6         | $0.33 \pm 0.01$ | $0.32 \pm 0.01$ | $0.00 \pm 0.01$ |
| <i>fc2</i>   | 7         | $0.33 \pm 0.01$ | $0.31 \pm 0.01$ | $0.00 \pm 0.01$ |

Table 9: Concept metrics for each NN layer using TCAV on SDD-OIA

|              | LAYER NUM | $\text{mAcc}_C$ | $\text{mF}_1(C)$ | $\text{Cls}(C)$ |
|--------------|-----------|-----------------|------------------|-----------------|
| <i>conv1</i> | 1         | $0.48 \pm 0.02$ | $0.44 \pm 0.01$  | $0.19 \pm 0.05$ |
| <i>conv2</i> | 2         | $0.49 \pm 0.02$ | $0.45 \pm 0.02$  | $0.20 \pm 0.06$ |
| <i>conv3</i> | 3         | $0.49 \pm 0.03$ | $0.45 \pm 0.03$  | $0.21 \pm 0.09$ |
| <i>conv4</i> | 4         | $0.48 \pm 0.02$ | $0.44 \pm 0.01$  | $0.23 \pm 0.15$ |
| <i>conv5</i> | 5         | $0.48 \pm 0.02$ | $0.44 \pm 0.02$  | $0.30 \pm 0.26$ |
| <i>conv6</i> | 6         | $0.46 \pm 0.02$ | $0.43 \pm 0.02$  | $0.34 \pm 0.33$ |
| <i>fc1</i>   | 7         | $0.50 \pm 0.02$ | $0.45 \pm 0.03$  | $0.38 \pm 0.31$ |
| <i>fc2</i>   | 8         | $0.49 \pm 0.02$ | $0.44 \pm 0.02$  | $0.43 \pm 0.28$ |

Table 10: Concept metrics for each NN layer using TCAV on SDD-OIA with synthetic images.

|              | LAYER NUM | $\text{mAcc}_C$ | $\text{mF}_1(C)$ | $\text{Cls}(C)$ |
|--------------|-----------|-----------------|------------------|-----------------|
| <i>conv1</i> | 1         | $0.47 \pm 0.02$ | $0.43 \pm 0.02$  | $0.18 \pm 0.03$ |
| <i>conv2</i> | 2         | $0.48 \pm 0.02$ | $0.44 \pm 0.02$  | $0.18 \pm 0.03$ |
| <i>conv3</i> | 3         | $0.49 \pm 0.01$ | $0.45 \pm 0.01$  | $0.23 \pm 0.12$ |
| <i>conv4</i> | 4         | $0.48 \pm 0.03$ | $0.44 \pm 0.03$  | $0.23 \pm 0.14$ |
| <i>conv5</i> | 5         | $0.48 \pm 0.02$ | $0.44 \pm 0.02$  | $0.29 \pm 0.25$ |
| <i>conv6</i> | 6         | $0.48 \pm 0.04$ | $0.45 \pm 0.04$  | $0.34 \pm 0.32$ |
| <i>fc1</i>   | 7         | $0.51 \pm 0.03$ | $0.45 \pm 0.03$  | $0.38 \pm 0.31$ |
| <i>fc2</i>   | 8         | $0.74 \pm 0.01$ | $0.42 \pm 0.01$  | $0.99 \pm 0.01$ |

### 3 Dataset Documentation: Datasheets for Datasets

Here, we answer the questions posed in the datasheets for datasets paper by Gebru et al [8].

#### 3.1 Motivation

**For what purpose was the dataset created?** `rsbench` was created to study the phenomenon of reasoning shortcuts (RSs) and concept quality in neuro-symbolic and neural architectures. `rsbench` offers several datasets where RSs occur, as well as a formal verification tool that enables users to verify how many RSs appear in the desired settings.

**Who created the dataset (e.g., which team, research group) and on behalf of which entity (e.g., company, institution, organisation)?** The datasets have been created by the “[Structured Machine Learning](#)” research group at the department of Information Engineering and Computer Science of the University of Trento in collaboration with the [april Lab](#) at School of Informatics, University of Edinburgh.

**Who funded the creation of the dataset?** The datasets have been created for research purposes. Funded by the European Union. The views and opinions expressed are however those of the author(s) only and do not necessarily reflect those of the European Union, the European Health and Digital Executive Agency (HaDEA) or the European Research Executive Agency. Neither the European Union nor the granting authority can be held responsible for them. Grant Agreement no. 101120763 - TANGO. PM is supported by the MSCA project GA n°101110960 “Probabilistic Formal Verification for Provably Trustworthy AI - PFV-4-PTAI”. AV is supported by the “UNREAL: Unified Reasoning Layer for Trustworthy ML” project (EP/Y023838/1) selected by the ERC and funded by UKRI EPSRC. Emile van Krieken was funded by ELIAI (The Edinburgh Laboratory for Integrated Artificial Intelligence), EPSRC (grant no. EP/W002876/1).

#### 3.2 Composition

**What do the instances that comprise the dataset represent (e.g., documents, photos, people, countries)?** All datasets contain annotations regarding concepts and labels. SDD-OIA comprises synthetically generated images depicting autonomous driving scenarios, such that if they were captured from a car’s dashcam, and includes additional information about the scene structure, such as bounding boxes, 2D and 3D coordinates, and spatial relationships among objects. MNMath, MNAdd-Half, MNAdd-EvenOdd and MNLogic contain synthetic images of handwritten digits, derived from the MNIST dataset. Kand-Logic consists of synthetic data showcasing patterns of geometric shapes with various colors. CLE4EVR features synthetically generated images representing 3D objects of different shapes, colors, materials, and dimensions; similar to SDD-OIA, they include additional scene information. BDD-OIA is a real-world, high-stakes dataset comprising images captured from a car’s dashcam. For a comprehensive description, please refer to [5].

**How many instances are there in total (of each type, if appropriate)?** Please refer to [Table 1](#).

**Does the dataset contain all possible instances or is it a sample (not necessarily random) of instances from a larger set?** The datasets represent samples from configurations that can be randomly generated according to a grammar. Using the generators, one can filter through various combinations and determine the level of exhaustiveness for generating examples. For a comprehensive overview of each dataset generation process, please consult [Section 1.5](#) and subsequent sections.

**What data does each instance consist of?** Alongside the images, each dataset sample is annotated with concepts and labels. However, for SDD-OIA and CLE4EVR, detailed scene information is included, encompassing individual 2D and 3D coordinates, bounding boxes, and spatial relationships between objects. For an complete overview refer to [Table 1](#).

231 **Is there a label or target associated with each instance?** Yes, the concept annotations are derived  
232 from the data generation process, while the labels are symbolically derived from the knowledge  
233 provided to the dataset.

234 **Is any information missing from individual instances?** No.

235 **Are relationships between individual instances made explicit (e.g., users' movie ratings, social  
236 network links)?** No, there are no connections between different instances.

237 **Are there recommended data splits (e.g., training, development/validation, testing)?** Informa-  
238 tion about the data splits we employed is reported in [Appendix B](#). The user has the freedom to choose  
239 the data splits they prefer during the data generation process.

240 **Are there any errors, sources of noise, or redundancies in the dataset?** No.

241 **Is the dataset self-contained, or does it link to or otherwise rely on external resources (e.g.,  
242 websites, tweets, other datasets)?** Some of our data sets build on top of established and stable  
243 data, namely MNIST and (the last frames provided by) BDD-100k, for which we provide download  
244 links. SDD-OIA makes use of external assets, listed in [Section 1.10.1](#). The ready-made SDD-OIA data  
245 set does not require these assets, but in order to use the generator these have to be obtained separately.

246 **Does the dataset contain data that might be considered confidential (e.g., data that is pro-  
247 tected by legal privilege or by doctor-patient confidentiality, data that includes the content of  
248 individuals' non-public communications)?** No.

249 **Does the dataset contain data that, if viewed directly, might be offensive, insulting, threatening,  
250 or might otherwise cause anxiety?** No.

251 **Does the dataset relate to people? If not, you may skip the remaining questions in this section.**  
252 BDD-OIA contains images depicting pedestrians and bicycle riders. Identifiable information in these  
253 images, including anonymization, rights, and risks, is managed by the original BDD-100k authors.

254 **Does the dataset identify any subpopulations (e.g., by age, gender)?** Please refer to [3.2](#).

255 **Is it possible to identify individuals (i.e., one or more natural persons), either directly or  
256 indirectly (i.e., in combination with other data) from the dataset?** Please refer to [3.2](#).

257 **Does the dataset contain data that might be considered sensitive in any way (e.g., data that  
258 reveals racial or ethnic origins, sexual orientations, religious beliefs, political opinions or  
259 union memberships, or locations; financial or health data; biometric or genetic data; forms  
260 of government identification, such as social security numbers; criminal history)?** Please refer  
261 to [3.2](#).

### 262 3.3 Collection Process

263 **How was the data associated with each instance acquired?** MNIST and BDD-100k have been  
264 obtained from their official repositories, <http://yann.lecun.com/exdb/mnist/> and <https://dl.cv.ethz.ch/bdd100k/data/>, respectively. All other data is synthetically generated.

266 **What mechanisms or procedures were used to collect the data (e.g., hardware apparatus  
267 or sensor, manual human curation, software program, software API)?** Details about data  
268 generations and software programs are discussed in [Appendix B](#).

269 **If the dataset is a sample from a larger set, what was the sampling strategy (e.g., determin-**  
270 **istic, probabilistic with specific sampling probabilities)?** Please refer to the similar question  
271 in [Section 3.2](#).

272 **Who was involved in the data collection process (e.g., students, crowdworkers, contractors)**  
273 **and how were they compensated (e.g., how much were crowdworkers paid)?** The authors were  
274 involved in the process of generating these datasets.

275 **Over what timeframe was the data collected?** The datasets were generated over a span of several  
276 days.

277 **Were any ethical review processes conducted (e.g., by an institutional review board)?** No.

278 **Does the dataset relate to people? If not, you may skip the remainder of the questions in this**  
279 **section.** BDD-OTA is the only dataset relating to people, please refer to [Section 3.2](#).

### 280 3.4 Preprocessing/Cleaning/Labeling

281 **Was any preprocessing/cleaning/labeling of the data done (e.g., discretization or bucketing,**  
282 **tokenization, part-of-speech tagging, SIFT feature extraction, removal of instances, processing**  
283 **of missing values)?** No, the datasets were generated along with labels and concept annotations.

284 **Was the “raw” data saved in addition to the preprocessed/cleaned/labeled data (e.g., to support**  
285 **unanticipated future uses)?** NA

286 **Is the software used to preprocess/clean/label the instances available?** NA

### 287 3.5 Uses

288 **Has the dataset been used for any tasks already?** In the paper, we demonstrate and benchmark  
289 the intended use of these datasets for evaluating concept quality and exploring RSs. MNAdd-EvenOdd,  
290 MNAdd-Half, and CLE4EVR have been utilized in previous studies [4, 3, 9] to investigate RSs and  
291 concept quality.

292 **Is there a repository that links to any or all papers or systems that use the dataset?** Yes,  
293 <https://unitn-sml.github.io/rsbench/>.

294 **What (other) tasks could the dataset be used for?** SDD-OTA and CLE4EVR offer additional  
295 information regarding the scene, including the 3D and 2D coordinates of objects, their bounding  
296 boxes, and the relationships between objects within the scene. This spatial data enables various  
297 applications such as object discovery, object detection, and reasoning over the scene’s structure.

298 **Is there anything about the composition of the dataset or the way it was collected and prepro-**  
299 **cessed/cleaned/labeled that might impact future uses** No.

300 **Are there tasks for which the dataset should not be used?** These datasets are meant for research  
301 purposes only.

### 302 3.6 Distribution

303 **Will the dataset be distributed to third parties outside of the entity (e.g., company, institution,**  
304 **organization) on behalf of which the dataset was created?** No.

305 **How will the dataset will be distributed (e.g., tarball on website, API, GitHub)?** The datasets,  
306 data generators, and related evaluation code are available on the website, enabling users to generate,  
307 download, and test their model on the data. Each dataset is provided in zip format and can be  
308 downloaded from the Zenodo link on the website.

309 **When will the dataset be distributed?** The datasets employed in the paper are available now on  
310 the website.

311 **Will the dataset be distributed under a copyright or other intellectual property (IP) license,  
312 and/or under applicable terms of use (ToU)?** Please refer to [Section 1.1](#).

313 **Have any third parties imposed IP-based or other restrictions on the data associated with the  
314 instances?** SDD-OIA makes use of assets taken from <https://free3d.com> and <https://www.turbosquid.com>. See [Section 1.10.1](#) for the full list and associated licenses. Other instances of  
315 datasets themselves do not have IP-based restrictions.  
316

317 **Do any export controls or other regulatory restrictions apply to the dataset or to individual  
318 instances?** Not that we are of.

### 319 **3.7 Maintenance**

320 **Who is supporting/hosting/maintaining the dataset?** The datasets are supported by the authors  
321 and will be actively maintained by the “Structured Machine Learning” research group in the future.  
322 For the hosting and maintenance plan, please refer to [Section 1.3](#).

323 **How can the owner/curator/manager of the dataset be contacted (e.g., email address)?** The  
324 authors of rsbench can be contacted via their email addresses: [samuele.bortolotti@unitn.it](mailto:samuele.bortolotti@unitn.it),  
325 [emanuele.marconato@unitn.it](mailto:emanuele.marconato@unitn.it).

326 **Is there an erratum?** If errors are found, an erratum will be added to the website.

327 **Will the dataset be updated (e.g., to correct labeling errors, add new instances, delete instances)?**  
328 Any potential future updates or extensions will be communicated via the website. The datasets will  
329 be versioned.

330 **If the dataset relates to people, are there applicable limits on the retention of the data associated  
331 with the instances (e.g., were individuals in question told that their data would be retained for a  
332 fixed period of time and then deleted)?** The only dataset involving people is BDD-OIA, please refer  
333 to [Section 3.2](#).

334 **Will older versions of the dataset continue to be supported/hosted/maintained?** We plan to  
335 continue hosting older versions of the dataset.

336 **If others want to extend/augment/build on/contribute to the dataset, is there a mechanism for  
337 them to do so?** Yes, the dataset generation code is available on our website.

### 338 **3.8 Other Questions**

339 **Is your dataset free of biases?** Our data sets are designed to induce a particular type of bias,  
340 namely reasoning shortcuts, in models, for the purpose of studying them. The data itself however is  
341 not biased towards human factors such as gender, ethnicity, age, etc.

342 **Can you guarantee compliance to GDPR?** No, we are unable to comment on legal matters.

### 3.9 Author Statement of Responsibility

The authors assume full responsibility for any rights violations and confirm the license associated with the datasets and their images.

### References

- [1] Yann LeCun. The mnist database of handwritten digits. <http://yann.lecun.com/exdb/mnist/>, 1998.
- [2] Fisher Yu, Haofeng Chen, Xin Wang, Wenqi Xian, Yingying Chen, Fangchen Liu, Vashisht Madhavan, and Trevor Darrell. Bdd100k: A diverse driving dataset for heterogeneous multitask learning. In *Proceedings of the IEEE/CVF conference on computer vision and pattern recognition*, pages 2636–2645, 2020.
- [3] Emanuele Marconato, Stefano Teso, Antonio Vergari, and Andrea Passerini. Not all neuro-symbolic concepts are created equal: Analysis and mitigation of reasoning shortcuts. In *NeurIPS*, 2023.
- [4] Emanuele Marconato, Samuele Bortolotti, Emile van Krieken, Antonio Vergari, Andrea Passerini, and Stefano Teso. BEARS Make Neuro-Symbolic Models Aware of their Reasoning Shortcuts. *arXiv preprint arXiv:2402.12240*, 2024.
- [5] Yiran Xu, Xiaoyin Yang, Lihang Gong, Hsuan-Chu Lin, Tz-Ying Wu, Yunsheng Li, and Nuno Vasconcelos. Explainable object-induced action decision for autonomous vehicles. In *CVPR*, pages 9523–9532, 2020.
- [6] Justin Johnson, Bharath Hariharan, Laurens Van Der Maaten, Li Fei-Fei, C Lawrence Zitnick, and Ross Girshick. CLEVR: A diagnostic dataset for compositional language and elementary visual reasoning. In *CVPR*, 2017.
- [7] Daphne Koller and Nir Friedman. *Probabilistic graphical models: principles and techniques*. MIT press, 2009.
- [8] Timnit Gebru, Jamie Morgenstern, Briana Vecchione, Jennifer Wortman Vaughan, Hanna Wallach, Hal Daumé III au2, and Kate Crawford. Datasheets for datasets, 2021.
- [9] Emanuele Marconato, Gianpaolo Bontempo, Elisa Ficarra, Simone Calderara, Andrea Passerini, and Stefano Teso. Neuro symbolic continual learning: Knowledge, reasoning shortcuts and concept rehearsal. In *ICML*, 2023.
